# Supplementary material for: Development of a Mucus Gland Bioreactor in Loach Paramisgurnus dabryanus
Source: MDPI journal article supplement (doi:10.3390/ijms22020687), 2021-01-12
Supplement: s1 [file s1]

## SUPPLEMENTAL FIGURES AND LEGENDS

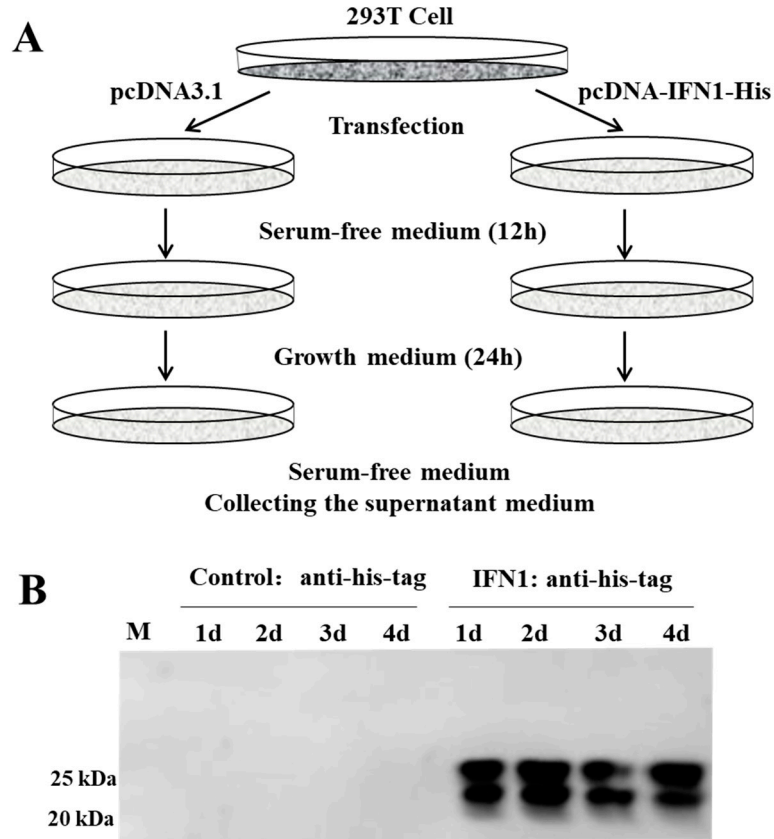

**Figure S1. Detection of grass carp IFN1 secreted from 293T cells.** (A) The steps of collecting recombinant interferon in vitro. 1: 293T cells were transfected pcDNA3.1; 2: 293T cells were transfected with pcDNA-IFN1-His. (B) Western blot analysis of IFN1 in supernatant of 293T cells. The supernatant mediums were collected from the control (control: transfected with pcDNA3.1) and IFN1-expressing cells (IFN1: transfected with pcDNA-IFN1-His) at 1, 2, 3 and 4 days.

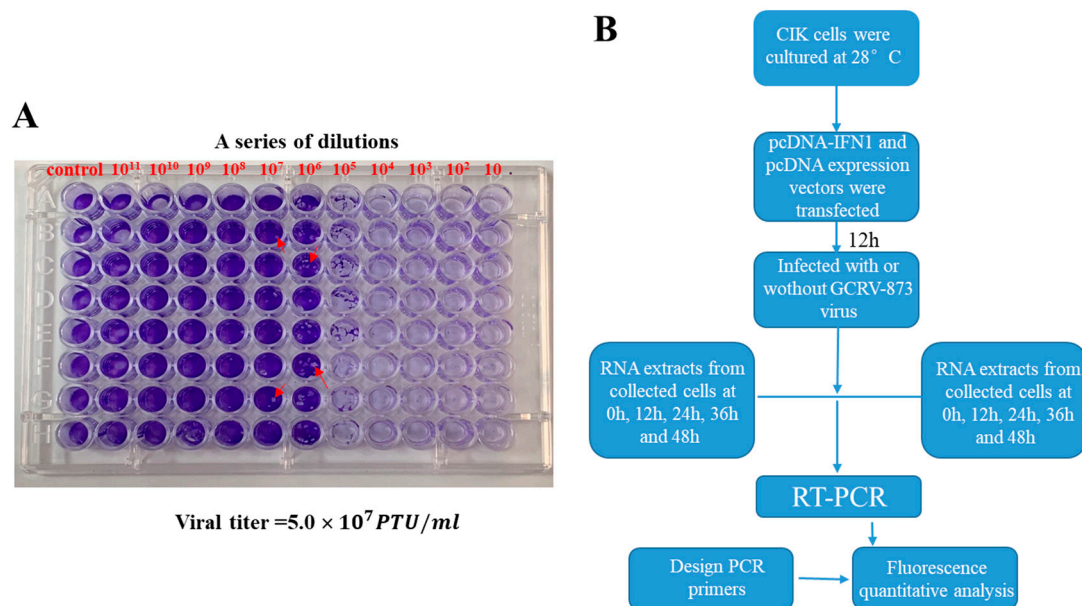

**Figure S2. Determining the titer of GCRV873 virus and detecting the antiviral capability of recombinant IFN1.** (A) Plaque assays of CIK cells infected with GCRV873 to determine the virus titer. Red arrow: CIK cells showing plaques. (B) The strategy for analyzing the antiviral ability of recombinant IFN1.

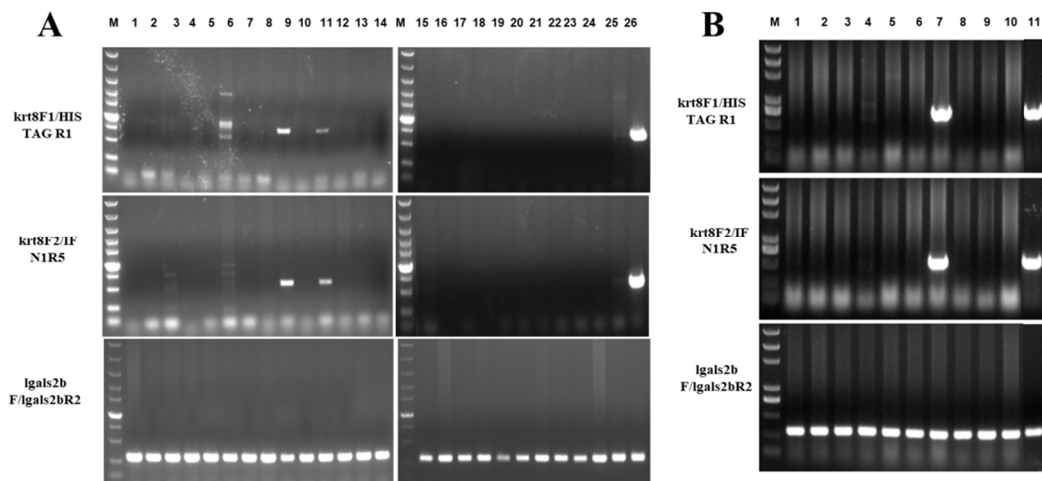

**Figure S3. Detection of transgenic loaches containing IFN1-expressing cassette in P0 founders.** Positive detection of P0 generation transgenic loaches. 1-24: genome DNA from P0 generation transgenic loaches; 25: negative control; 26: positive control; (B) Positive detection of F1 generation transgenic loaches; 1-9: genome DNA from F1 generation transgenic loaches; 10: negative control; 11: positive control.

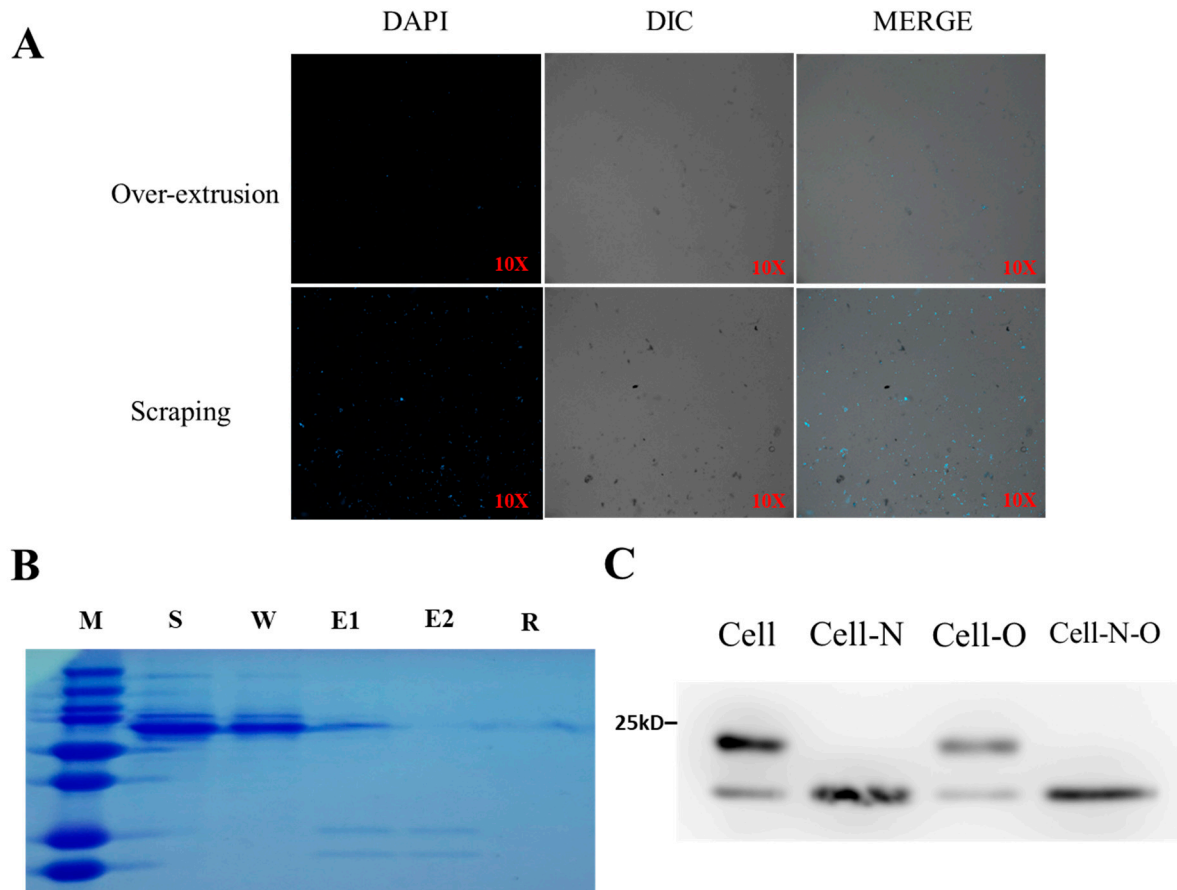

**Figure S4. The extraction of mucus from loaches and deglycosylation of purified grass carp IFN1 from 293T cells.** The fluorescent staining of DAPI of two different approaches for extracting mucus from loaches. (B) Purification of recombinant IFN1. M: protein marker; S: supernatant; W: washing liquid; E1: first elution; E2: second elution; R: remaining liquid in the column. (C) The deglycosylation of purified grass carp IFN1 from 293T cells. Cell: purified grass carp IFN1 from 293T cells; Cell-N: de-N-glycosylated purified grass carp IFN1 from 293T cells; Cell-O: de-O-glycosylated purified grass carp IFN1 from 293T cells; Cell-N-O: de-N&O-glycosylated purified grass carp IFN1 from 293T cells.
